# Supplementary material for: Effect of Decreasing Intraluteal Progesterone on Sensitivity of the Early Porcine Corpus Luteum to the Luteolytic Actions of Prostaglandin F2alpha1
Source: Oxford University Press journal article supplement (doi:10.1095/biolreprod.110.084368), 2010-08-25
Supplement: biolreprod.110.084368-1.pdf [file biolreprod.110.084368-1.pdf]

Diaz et al., Supplemental Table S1. Primer sequences used for PCR.<sup>a</sup>

| Gene           | Forward                 | Reverse                | Accession    |
|----------------|-------------------------|------------------------|--------------|
| <i>ACTB</i>    | CCCAGCACGATGAAGATCAAG   | AGAAGCATTTGCGGTGGACGA  | AY550069     |
| <i>CASP3</i>   | TTGGACTGTGGGATTGAGACG   | TGCACAAAGTGACTGGATGAAC | NM_214131    |
| <i>CYP19A1</i> | TTCCATCACCAAGCACCTGGAC  | GGCCAAAATCAACTCAGTGGCG | U92245       |
| <i>ESR2</i>    | TCCTTTAGCCATCCATTGCC    | TCCTGACGCATAATCACTGCA  | AF164957     |
| <i>FOSB</i>    | CCGGGCATGAGTGGCTACAG    | CGTCTCCTCTCGGGTCTCCT   | AF120155     |
| <i>GAPDH</i>   | ATTGCCCTCAACGACCACTT    | ACATGACGAGGCAGGTCTCC   | X94251       |
| <i>PLA2G1B</i> | TCAACAACCTATGGCTGCTACTG | GCTTTCGGTGTAGGGATTGTC  | NM_001004037 |
| <i>PTGS2</i>   | GACGTAAGGGTGGAAATTTGTGA | CCAGTGCTTTGCCCAGAATGT  | AY028583     |

<sup>a</sup> All sequences are 5' to 3'.
